# Supplementary material
Source: PubMed Central journal article supplement (PMC5010357)
Supplement: jp6b01659_si_001.pdf [file jp6b01659_si_001.pdf]

# Supporting information for: Free Energy of Ligand Removal in the Metal-Organic Framework UiO-66

Jessica K. Bristow,<sup>†</sup> Katrine Svane,<sup>†</sup> Davide Tiana,<sup>†</sup> Jonathan M. Skelton,<sup>†</sup>  
Julian. D. Gale,<sup>\*,‡</sup> and Aron Walsh<sup>\*,†</sup>

<sup>†</sup>*Centre for Sustainable Chemical Technologies and Department of Chemistry, University of Bath, Claverton Down, Bath BA2 7AY, UK*

<sup>‡</sup>*Department of Applied Chemistry , Nanochemistry Research Institute, Curtin University of Technology , P.O. Box U, 6845, Perth, WA*

E-mail: j.gale@curtin.edu.au; a.walsh@bath.ac.uk

## 1. Substitution by monodentate ligands

When substituting a ligand for 2 monodentate molecules (one charge capping and one neutral) there is a choice on whether to do this so that the different groups are trans or cis. We identify trans to be favourable as a higher symmetry is maintained (Table S1).

Table S1: Relative energies of 1 linker removal from 2 example structures between substituting cis or trans with respect to the metal node.

| System                            | $U_{lattice}$ cis (kJmol <sup>-1</sup> ) | $U_{lattice}$ trans (kJmol <sup>-1</sup> ) | $\Delta E$ (kJmol <sup>-1</sup> ) |
|-----------------------------------|------------------------------------------|--------------------------------------------|-----------------------------------|
| Cl <sup>-</sup> /H <sub>2</sub> O | -216878.0                                | -216895.8                                  | 17.8                              |
| OH <sup>-</sup> /H <sub>2</sub> O | -217198.9                                | -217207.0                                  | 8.1                               |

## 2. DMF dielectric constant

The temperature dependence of the dielectric constant as reported by Bass *et al.* was used to obtain the free energies of solvation of molecules using the COSMO program in NWChem.<sup>S1</sup>

Table S2 gives the values extracted from reported values as published in the referenced paper.

Figure S12 gives the published data points.

Table S2: Dielectric constant of DMF with temperature as reported by Bass *et al.*

| Temperature (K) | Dielectric constant ( $\epsilon_0$ ) |
|-----------------|--------------------------------------|
| 215             | 58.0                                 |
| 250             | 47.5                                 |
| 300             | 37.2                                 |
| 350             | 29.0                                 |
| 400             | 24.0                                 |
| 410             | 23.3                                 |

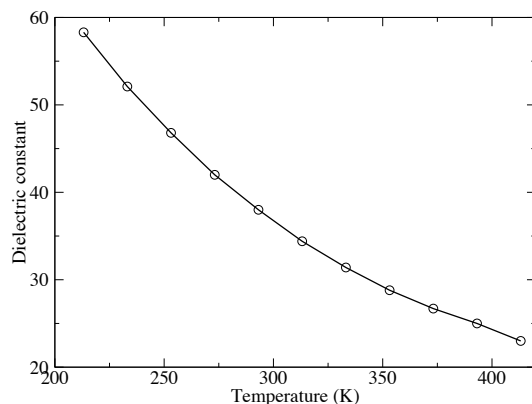

Figure S1: Dielectric constant of DMF with temperature as published by Bass *et al.*

## 3. Forcefield description of bulk UiO-66

Approaches to forcefield parametrisation can differ.<sup>S2-S4</sup> In this instance forcefield parameters are taken from CHARMM<sup>S5,S6</sup> with the total energy ( $E_{CHARMM}$ ) calculated under the harmonic approximation considering both non-bonding and bonding parameters. We

approached the interaction between metal node and organic linker by considering these components are separate entities bonded by van der Waals and charge interactions. Organic linkers including those used for charge capping were fully described by a bonding forcefield with CHARMM parameters with Lennard-Jones non-bonding interactions. The explicit parameters will be provided in the SI. Water molecules were described with the TIP3P (original<sup>S7</sup> and modified<sup>S8</sup>) model.

$$E_{CHARMM} = \sum E^{str} + \sum E^{bnd} + \sum E^{opb} + \sum E^{tor} + \sum (E^{VdW} + E^{Coul}) \quad (1)$$

$$U^{L-J} = \frac{C_m}{\mathbf{r}^m} - \frac{C_6}{\mathbf{r}^6} \quad (2)$$

Formal charges were used for the metal ions, the head of the carboxylic acid used charges for similar carboxylic acid systems.<sup>S9</sup> The remaining charges were calculated in GULP<sup>S10</sup> using the Gasteiger charge equilibrium model considering bond increments and nearest neighbour electronegativities.<sup>S11</sup>

Buckingham non-bonding terms were then used to describe the interaction between metal node and organic linker to reproduce bond lengths from density functional theory (DFT):

$$U^{Buck} = A \exp\left(-\frac{\mathbf{r}}{\rho}\right) - \frac{C_6}{\mathbf{r}^6} \quad (3)$$

All Buckingham terms were fitted to recreate both structural and materials properties as previously described.

Table S3: Experiment vs. forcefield for the structural parameters of UiO-66.

| Property                | Experiment <sup>S12</sup> | forcefield |
|-------------------------|---------------------------|------------|
| <b>unit cell</b>        |                           |            |
| <i>a</i>                | 20.978                    | 20.893     |
| $\alpha$                | 90.0                      | 90.0       |
| <b>bond lengths</b>     |                           |            |
| Zr-O(carb)              | 2.216                     | 2.250      |
| Zr-O(O-H)               | 2.256                     | 2.220      |
| Zr-O(oxide)             | 2.062                     | 2.083      |
| C(carb)-O(carb)         | 1.275                     | 1.279      |
| C(benz)-C(benz)         | 1.389                     | 1.376      |
| C(benz)-C(carb)         | 1.491                     | 1.507      |
| C(benz)-H(benz)         | 1.094                     | 1.083      |
| O(O-H)-H(O-H)           | 0.972                     | 0.979      |
| <b>bond angles</b>      |                           |            |
| Zr-O(oxide)-Zr          | 117.0                     | 118.0      |
| O(carb)-Zr-O(carb)      | 79.5                      | 85.4       |
| Zr-O(O-H)-Zr            | 102.4                     | 107.1      |
| O(carb)-C(carb)-O(carb) | 125.9                     | 125.0      |
| O(carb)-C(carb)-C(benz) | 117.3                     | 117.1      |
| C(carb)-C(benz)-C(benz) | 120.0                     | 119.7      |
| C(benz)-C(benz)-H(benz) | 121.4                     | 121.2      |

## 4. Defect formation energies

The thermodynamic cycle considered is given in Figure S2. The description of each Gibbs free energy value used to calculate the final defect energy of formation are provided in Table S4.

Table S4: Free-energy components considered to calculate the total defect energy of formation.

| Process      | Description                                                                                         | Method of calculation |
|--------------|-----------------------------------------------------------------------------------------------------|-----------------------|
| $\Delta G_1$ | desolvation of XH                                                                                   | NWChem                |
| $\Delta G_2$ | gas phase dissociation of XH                                                                        | NIST database         |
| $\Delta G_3$ | defect formation energy<br>( $\Delta G_3 = (G_{perfect} + E_{XH}) - (G_{defective} + E_{BDCH_2})$ ) | GULP                  |
| $\Delta G_4$ | gas phase double protonation of BDC                                                                 | NIST database         |
| $\Delta G_5$ | solvation free-energy of BDC in DMF                                                                 | NWChem                |

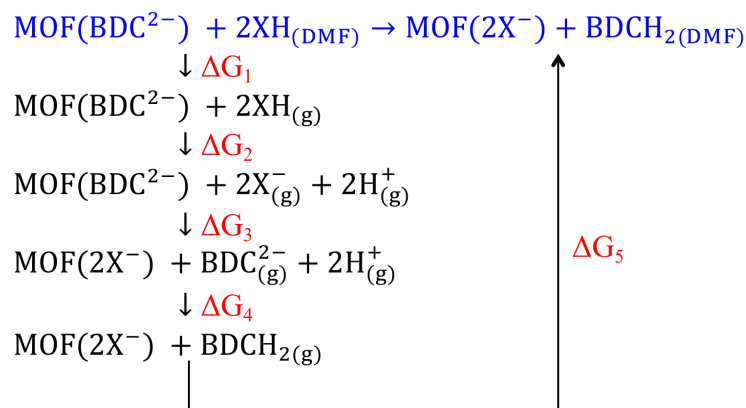

Figure S2: Thermodynamic cycle for the removal of 1 BDC linker from UiO-66, where X is the anion used for charge compensation.

Table S5: Desolvation free-energies in DMF ( $\Delta G_1$ ).

| Temperature (K)      | Energy (kcalmol <sup>-1</sup> ) |      |      |      |      |      |
|----------------------|---------------------------------|------|------|------|------|------|
|                      | 215                             | 250  | 300  | 350  | 400  | 410  |
| HCl                  | 3.46                            | 3.45 | 3.42 | 3.39 | 3.36 | 3.35 |
| H <sub>2</sub> O     | 3.31                            | 3.30 | 3.28 | 3.25 | 3.22 | 3.22 |
| CH <sub>3</sub> COOH | 8.60                            | 8.56 | 8.49 | 8.41 | 8.33 | 8.32 |
| DMF                  | 6.73                            | 6.70 | 6.65 | 6.58 | 6.52 | 6.51 |

Table S6: Gas phase dissociation of X-H.

| H-X                  | Energy (kcalmol <sup>-1</sup> ) |
|----------------------|---------------------------------|
| HCl                  | 328.107                         |
| H <sub>2</sub> O     | 383.7                           |
| CH <sub>3</sub> COOH | 348.23                          |

Table S7: Double protonation of BDC-H<sub>2</sub>.

|                    | Energy (kcalmol <sup>-1</sup> ) |
|--------------------|---------------------------------|
| BDC-H <sub>2</sub> | -742.09                         |

Table S8: Solvation free-energies in DMF ( $\Delta G_5$ ) for BDC-H<sub>2</sub>.

| H-X                | Energy (kcalmol <sup>-1</sup> ) |       |       |       |       |       |       |
|--------------------|---------------------------------|-------|-------|-------|-------|-------|-------|
|                    | Temperature (K)                 | 215   | 250   | 300   | 350   | 400   | 410   |
| BDC-H <sub>2</sub> |                                 | -8.05 | -8.02 | -7.96 | -7.89 | -7.82 | -7.81 |

Table S9: Desolvation free-energies in DMF.

| Temperature (K)      | Energy (kcalmol <sup>-1</sup> ) |      |      |      |      |      |
|----------------------|---------------------------------|------|------|------|------|------|
|                      | 215                             | 250  | 300  | 350  | 400  | 410  |
| HCl                  | 3.46                            | 3.45 | 3.42 | 3.39 | 3.36 | 3.35 |
| H <sub>2</sub> O     | 3.31                            | 3.30 | 3.28 | 3.25 | 3.22 | 3.22 |
| CH <sub>3</sub> COOH | 8.60                            | 8.56 | 8.49 | 8.41 | 8.33 | 8.32 |
| DMF                  | 6.73                            | 6.70 | 6.65 | 6.58 | 6.52 | 6.51 |

## 5. DFT *vs.* forcefield for defective UiO-66

Table S10: Zr-ligand bond length comparison between density functional theory and our forcefield.

| Ligand                           | Zr-Ligand bond length in Å |            |
|----------------------------------|----------------------------|------------|
|                                  | DFT/PBEsol                 | forcefield |
| Cl <sup>-</sup>                  | 2.536                      | 2.505      |
| H <sub>2</sub> O                 | 2.285                      | 2.233      |
| OH <sup>-</sup>                  | 2.257                      | 2.220      |
| DMF <sup>-</sup>                 | 2.279                      | 2.284      |
| CH <sub>3</sub> COO <sup>-</sup> | 2.207                      | 2.209      |

## 6. Linker vacancy configurations

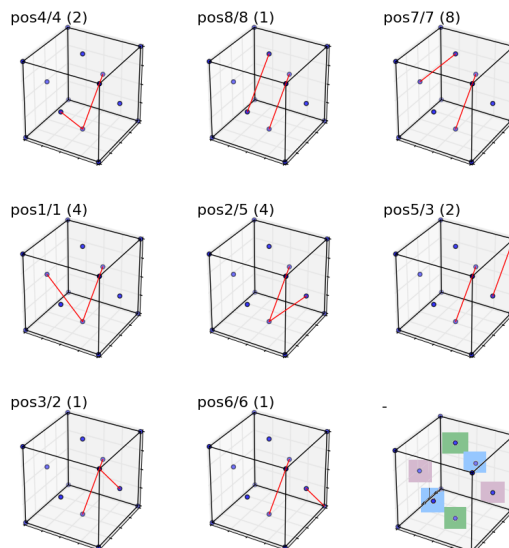

Figure S3: Configurations for 2 vacant BDC linkers. Red lines represent the missing linkers with the names of the configurations corresponding to those plotted in Figure 2 for the acetate/ $\text{Cl}^-$ / $\text{H}_2\text{O}$  capping mechanisms, respectively. Configurations are numbered in order of defect energy magnitude and therefore differ for either capping mechanism. In brackets is the degeneracy of configuration used to calculate the Boltzmann distributions. There are 4 metal nodes in the cubic unit-cell, individual metal nodes are highlighted as green, blue and pink with all 8 corners of the plotted cubic cell making the fourth metal node.



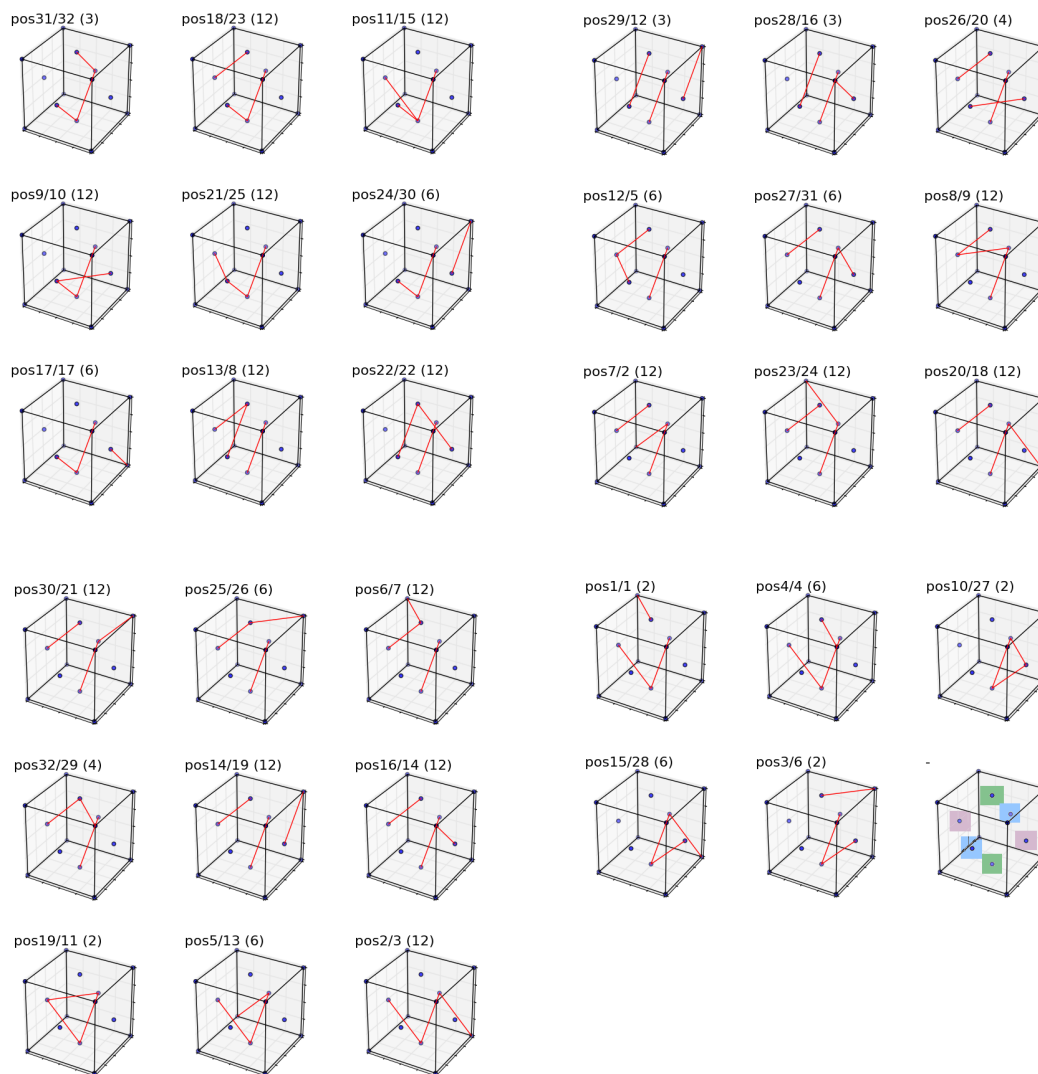

Figure S4: Configurations for 3 vacant BDC linkers. Red lines represent the missing linkers with the names of the configurations corresponding to those plotted in Figure 2 for the acetate/ $\text{Cl}^-$ / $\text{H}_2\text{O}$  capping mechanisms respectively. Configurations are numbered in order of defect energy magnitude and therefore differ for either capping mechanism. In brackets is the degeneracy of configuration used to calculate the Boltzmann distributions. There are 4 metal nodes in the cubic unit-cell, individual metal nodes are highlighted as green, blue and pink with all 8 corners of the plotted cubic cell making the fourth metal node.

## 7. Free energies

Table S11: Helmholtz free energies ( $\text{kJmol}^{-1}$ ) and overall defect formation energy ( $E_f(\text{defect})$ ) for removal of 1 linker in UiO-66 for the  $\text{Cl}^{-1}$  charge capping models.  $\Delta A$  was calculated to include contributions from enthalpy and entropy for the specified temperatures ( $\Delta A = \Delta U - T\Delta S$ ). Values given in brackets follow full volume relaxation at the stated temperature and therefore are the Gibbs free-energy ( $\Delta G = \Delta H - T\Delta S$ ).

|                                                      | Temperature (K) | A ( $\text{kJmol}^{-1}$ ) | $E_f(\text{defect})$ ( $\text{kJmol}^{-1}$ ) |
|------------------------------------------------------|-----------------|---------------------------|----------------------------------------------|
| <b><math>\text{Cl}^{-}</math></b>                    |                 |                           |                                              |
|                                                      | 215             | 578.2                     | 214.5                                        |
|                                                      | 250             | 576.4                     | 212.7                                        |
|                                                      | 300             | 574.4                     | 210.4                                        |
|                                                      | 350             | 571.2                     | 207.0                                        |
|                                                      | 400             | 568.6                     | 204.1                                        |
|                                                      | 410             | 568.1                     | 203.5                                        |
| <b><math>\text{Cl}^{-}/\text{H}_2\text{O}</math></b> |                 |                           |                                              |
|                                                      | 215             | 470.7                     | 134.4                                        |
|                                                      | 250             | 483.3                     | 146.9                                        |
|                                                      | 300             | 502.0 (499.8)             | 165.5                                        |
|                                                      | 350             | 519.8                     | 183.1                                        |
|                                                      | 400             | 538.4                     | 201.4                                        |
|                                                      | 410             | 542.1                     | 205.1                                        |
| <b><math>\text{Cl}^{-}/\text{DMF}</math></b>         |                 |                           |                                              |
|                                                      | 215             | 478.1                     | 170.4                                        |
|                                                      | 250             | 490.0                     | 182.0                                        |
|                                                      | 300             | 507.3                     | 199.0                                        |
|                                                      | 350             | 523.5                     | 214.6                                        |
|                                                      | 400             | 540.0                     | 230.7                                        |
|                                                      | 410             | 543.3                     | 233.8                                        |

Table S12: Helmholtz free energies ( $A$ ) and overall defect formation energy ( $E_f(\text{defect})$ ) for the removal of 1 linker from UiO-66. Given in this table are results considering  $\text{OH}^-$  and  $\text{CH}_3\text{COO}^-$  charge capping models.  $\Delta A$  was calculated to include contributions from enthalpy and entropy for the specified temperatures ( $\Delta A = \Delta U - T\Delta S$ ). Values given in brackets follow full volume relaxation at the stated temperature and therefore are the Gibbs free-energy ( $\Delta G = \Delta H - T\Delta S$ ).

|                                                    | Temperature (K) | $A$ (kJmol $^{-1}$ ) | $E_f(\text{defect})$ (kJmol $^{-1}$ ) |
|----------------------------------------------------|-----------------|----------------------|---------------------------------------|
| <b><math>\text{OH}^-</math></b>                    |                 |                      |                                       |
|                                                    | 215             | 166.1                | 293.7                                 |
|                                                    | 250             | 177.5                | 305.0                                 |
|                                                    | 300             | 194.2                | 321.7                                 |
|                                                    | 350             | 209.8                | 337.1                                 |
|                                                    | 400             | 225.8                | 352.9                                 |
|                                                    | 410             | 229.0                | 356.1                                 |
| <b><math>\text{OH}^-/\text{H}_2\text{O}</math></b> |                 |                      |                                       |
|                                                    | 215             | 166.1                | 338.0                                 |
|                                                    | 250             | 177.5                | 349.1                                 |
|                                                    | 300             | 194.2                | 365.3                                 |
|                                                    | 350             | 209.8                | 380.3                                 |
|                                                    | 400             | 225.8                | 395.6                                 |
|                                                    | 410             | 229.0                | 398.8                                 |
| <b><math>\text{OH}^-/\text{DMF}</math></b>         |                 |                      |                                       |
|                                                    | 215             | 234.8                | 391.1                                 |
|                                                    | 250             | 246.2                | 401.2                                 |
|                                                    | 300             | 262.6                | 418.3                                 |
|                                                    | 350             | 277.6                | 432.7                                 |
|                                                    | 400             | 292.9                | 447.6                                 |
|                                                    | 410             | 295.9                | 450.6                                 |
| <b><math>\text{CH}_3\text{COO}^-</math></b>        |                 |                      |                                       |
|                                                    | 215             | 248.8                | 96.2                                  |
|                                                    | 250             | 256.0                | 103.2                                 |
|                                                    | 300             | 266.9 (265.2)        | 113.7                                 |
|                                                    | 350             | 276.7                | 123.2                                 |
|                                                    | 400             | 287.1                | 133.2                                 |
|                                                    | 410             | 289.2                | 135.3                                 |

Table S13: Overall defect formation energy per linker removal for the removal of 2 linkers from UiO-66 for the  $\text{CH}_3\text{COO}^{-1}$  charge capping models.

| $\text{CH}_3/\text{OO}^-$<br>Temperature (K) | $E_f(\text{defect})$ ( $\text{kJmol}^{-1}$ ) |       |       |       |       |       |       |       |
|----------------------------------------------|----------------------------------------------|-------|-------|-------|-------|-------|-------|-------|
|                                              | Configuration                                |       |       |       |       |       |       |       |
|                                              | 1                                            | 2     | 3     | 4     | 5     | 6     | 7     | 8     |
| 215                                          | 63.0                                         | 80.9  | 83.6  | 85.2  | 89.1  | 91.3  | 91.9  | 93.9  |
| 250                                          | 68.8                                         | 86.6  | 89.3  | 91.0  | 94.8  | 97.0  | 97.6  | 99.4  |
| 300                                          | 77.2                                         | 94.8  | 97.5  | 99.5  | 103.0 | 105.2 | 105.8 | 107.5 |
| 350                                          | 85.1                                         | 102.4 | 105.2 | 107.3 | 110.7 | 112.8 | 113.5 | 114.9 |
| 400                                          | 93.1                                         | 110.3 | 113.0 | 115.5 | 118.5 | 120.7 | 121.4 | 122.6 |
| 410                                          | 94.8                                         | 111.9 | 114.6 | 117.1 | 120.1 | 122.3 | 123.0 | 124.2 |
| $\text{Cl}^-/\text{H}_2\text{O}$             | 1                                            | 2     | 3     | 4     | 5     | 6     | 7     | 8     |
| 215                                          | 115.0                                        | 129.2 | 129.4 | 130.6 | 132.5 | 132.9 | 133.0 | 133.4 |
| 250                                          | 126.3                                        | 140.6 | 140.8 | 141.7 | 143.9 | 144.3 | 144.4 | 144.8 |
| 300                                          | 142.9                                        | 157.2 | 157.4 | 157.9 | 160.6 | 160.9 | 161.1 | 161.5 |
| 350                                          | 159.0                                        | 173.3 | 173.5 | 173.5 | 176.8 | 176.9 | 177.2 | 177.6 |
| 400                                          | 175.4                                        | 189.7 | 189.9 | 189.4 | 193.4 | 193.3 | 193.6 | 194.1 |
| 410                                          | 178.7                                        | 193.0 | 193.2 | 192.6 | 196.7 | 196.5 | 196.9 | 197.4 |

Table S14: Overall defect formation energy per linker removal for the removal of 3 linkers from UiO-66. Given in this table are results considering  $\text{CH}_3\text{COO}^{-1}$  charge capping model.

| $\text{CH}_3/\text{OO}^-$<br>Temperature (K) | $E_f(\text{defect})$ ( $\text{kJmol}^{-1}$ ) |       |       |       |       |       |       |       |
|----------------------------------------------|----------------------------------------------|-------|-------|-------|-------|-------|-------|-------|
|                                              | Configuration                                |       |       |       |       |       |       |       |
|                                              | 1                                            | 2     | 3     | 4     | 5     | 6     | 7     | 8     |
| 215                                          | 38.1                                         | 61.9  | 66.2  | 65.5  | 67.3  | 70.2  | 70.5  | 71.4  |
| 250                                          | 43.4                                         | 67.1  | 71.6  | 70.8  | 72.8  | 75.4  | 75.6  | 76.7  |
| 300                                          | 50.9                                         | 74.5  | 79.3  | 78.5  | 80.8  | 82.8  | 83.0  | 84.3  |
| 350                                          | 58.0                                         | 81.5  | 86.6  | 85.8  | 88.3  | 89.8  | 90.0  | 91.5  |
| 400                                          | 65.3                                         | 88.6  | 94.0  | 93.1  | 96.0  | 96.9  | 97.1  | 98.7  |
| 410                                          | 66.7                                         | 90.0  | 95.5  | 94.6  | 97.6  | 98.4  | 98.5  | 100.2 |
|                                              | 9                                            | 10    | 11    | 12    | 13    | 14    | 15    | 16    |
| 215                                          | 72.1                                         | 73.0  | 74.4  | 74.6  | 75.0  | 76.9  | 76.9  | 77.1  |
| 250                                          | 77.3                                         | 78.3  | 79.6  | 79.9  | 80.4  | 82.2  | 82.2  | 82.5  |
| 300                                          | 84.9                                         | 85.8  | 87.1  | 87.4  | 88.2  | 89.8  | 89.8  | 90.4  |
| 350                                          | 92.1                                         | 92.9  | 94.1  | 94.4  | 95.5  | 97.0  | 97.0  | 97.8  |
| 400                                          | 99.3                                         | 100.1 | 101.2 | 101.6 | 103.0 | 104.3 | 104.3 | 105.3 |
| 410                                          | 100.8                                        | 101.6 | 102.6 | 103.1 | 104.5 | 105.8 | 105.7 | 106.9 |
|                                              | 17                                           | 18    | 19    | 20    | 21    | 22    | 23    | 24    |
| 215                                          | 80.7                                         | 81.0  | 81.7  | 82.1  | 82.4  | 82.4  | 82.7  | 83.8  |
| 250                                          | 86.2                                         | 86.4  | 86.9  | 87.3  | 87.6  | 87.7  | 88.1  | 89.1  |
| 300                                          | 94.0                                         | 94.1  | 94.4  | 94.8  | 95.2  | 95.4  | 96.0  | 96.7  |
| 350                                          | 101.3                                        | 101.3 | 101.5 | 101.8 | 102.3 | 102.6 | 103.4 | 103.8 |
| 400                                          | 108.8                                        | 108.7 | 108.6 | 109.0 | 109.5 | 110.0 | 110.9 | 111.1 |
| 410                                          | 110.3                                        | 110.2 | 110.1 | 110.4 | 110.9 | 111.5 | 112.5 | 112.6 |
|                                              | 25                                           | 26    | 27    | 28    | 29    | 30    | 31    | 32    |
| 215                                          | 83.8                                         | 84.8  | 86.6  | 87.0  | 87.0  | 89.0  | 89.4  | 90.4  |
| 250                                          | 89.1                                         | 90.1  | 91.9  | 92.1  | 92.2  | 94.2  | 94.5  | 95.7  |
| 300                                          | 96.9                                         | 97.7  | 99.5  | 99.6  | 99.7  | 101.9 | 101.8 | 103.4 |
| 350                                          | 104.2                                        | 104.9 | 106.7 | 106.6 | 106.8 | 109.0 | 108.6 | 110.6 |
| 400                                          | 111.6                                        | 112.2 | 114.0 | 113.7 | 113.9 | 116.2 | 115.5 | 117.9 |
| 410                                          | 113.1                                        | 113.7 | 115.5 | 115.2 | 115.4 | 117.7 | 116.9 | 119.3 |

Table S15: Overall defect formation energy per linker removal for the removal of 3 linkers from UiO-66. Given in this table are results considering  $\text{Cl}^{-1}/\text{H}_2\text{O}$  charge capping model.

| $\text{Cl}^{-1}/\text{H}_2\text{O}$<br>Temperature (K) | $E_f(\text{defect})$ ( $\text{kJmol}^{-1}$ ) |       |       |       |       |        |        |       |
|--------------------------------------------------------|----------------------------------------------|-------|-------|-------|-------|--------|--------|-------|
|                                                        | Configuration                                |       |       |       |       |        |        |       |
|                                                        | 1                                            | 2     | 3     | 4     | 5     | 6      | 7      | 8     |
| 215                                                    | 92.4                                         | 118.8 | 119.4 | 119.9 | 121.1 | 121.5  | 121.7  | 122.1 |
| 250                                                    | 103.5                                        | 129.8 | 130.4 | 130.9 | 132.2 | 132.5  | 132.8  | 133.1 |
| 300                                                    | 119.7                                        | 145.8 | 146.4 | 146.9 | 148.1 | 148.3  | 148.8  | 149.0 |
| 350                                                    | 135.6                                        | 161.3 | 162.0 | 162.5 | 163.7 | 163.8  | 164.5  | 164.5 |
| 400                                                    | 151.7                                        | 177.1 | 177.9 | 178.3 | 179.6 | 179.6  | 180.4  | 180.3 |
| 410                                                    | 155.0                                        | 180.3 | 181.1 | 181.5 | 182.7 | 182.7  | 183.6  | 183.5 |
|                                                        | 9                                            | 10    | 11    | 12    | 13    | 14     | 15     | 16    |
| 215                                                    | 122.6                                        | 124.1 | 124.4 | 126.7 | 127.5 | 129.4  | 129.4  | 129.4 |
| 250                                                    | 133.7                                        | 134.8 | 135.7 | 137.8 | 138.5 | 140.4  | 140.4  | 140.4 |
| 300                                                    | 149.7                                        | 150.3 | 151.9 | 153.7 | 154.5 | 156.4  | 156.2  | 156.4 |
| 350                                                    | 165.4                                        | 165.5 | 167.9 | 169.3 | 170.1 | 172.0  | 171.8  | 171.9 |
| 400                                                    | 181.2                                        | 180.9 | 184.1 | 185.0 | 185.9 | 187.8  | 187.5  | 187.6 |
| 410                                                    | 184.4                                        | 183.9 | 187.3 | 188.2 | 189.1 | 191.0  | 190.7  | 190.8 |
|                                                        | 17                                           | 18    | 19    | 20    | 21    | 22     | 23     | 24    |
| 215                                                    | 129.9                                        | 130.5 | 130.6 | 131.3 | 131.5 | 131.7  | 132.03 | 132.2 |
| 250                                                    | 140.9                                        | 141.6 | 141.7 | 142.4 | 142.5 | 142.8  | 143.00 | 143.2 |
| 300                                                    | 156.7                                        | 157.6 | 157.7 | 158.4 | 158.5 | 158.8  | 158.83 | 159.1 |
| 350                                                    | 172.1                                        | 173.3 | 173.4 | 174.0 | 174.1 | 174.5  | 174.30 | 174.7 |
| 400                                                    | 187.8                                        | 189.1 | 189.3 | 189.8 | 189.9 | 190.4  | 189.97 | 190.5 |
| 410                                                    | 190.9                                        | 192.3 | 192.4 | 193.0 | 193.1 | 193.6  | 193.10 | 193.7 |
|                                                        | 25                                           | 26    | 27    | 28    | 29    | 30     | 31     | 32    |
| 215                                                    | 132.6                                        | 132.7 | 133.4 | 133.7 | 134.2 | 134.53 | 135.0  | 138.6 |
| 250                                                    | 143.3                                        | 143.8 | 144.6 | 144.8 | 145.3 | 145.61 | 145.8  | 149.6 |
| 300                                                    | 158.9                                        | 159.8 | 160.7 | 160.8 | 161.3 | 161.61 | 161.3  | 165.5 |
| 350                                                    | 174.1                                        | 175.5 | 176.6 | 176.5 | 176.9 | 177.26 | 176.4  | 181.1 |
| 400                                                    | 189.5                                        | 191.4 | 192.6 | 192.5 | 192.8 | 193.11 | 191.8  | 196.9 |
| 410                                                    | 192.5                                        | 194.6 | 195.8 | 195.6 | 196.0 | 196.28 | 194.9  | 200.0 |

## 8. XRD for $\text{Cl}^-/\text{H}_2\text{O}$ charge compensation

Simulated XRD patterns ( $\lambda = 1.5418$  nm) for the cubic and monoclinic phases of UiO-66 calculated with 1 and 7 linkers missing are given (Figures S5 and S6).

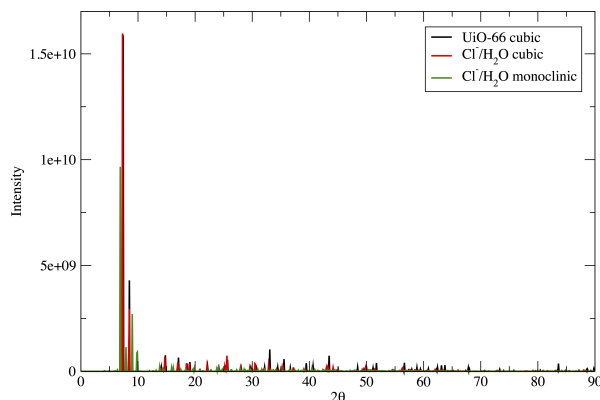

Figure S5: XRD patterns of the cubic phase of UiO-66 with 1 (black) missing linker and monoclinic phase 7 (red) missing linkers with  $\text{Cl}^-/\text{H}_2\text{O}$  as the charge capping mechanism.

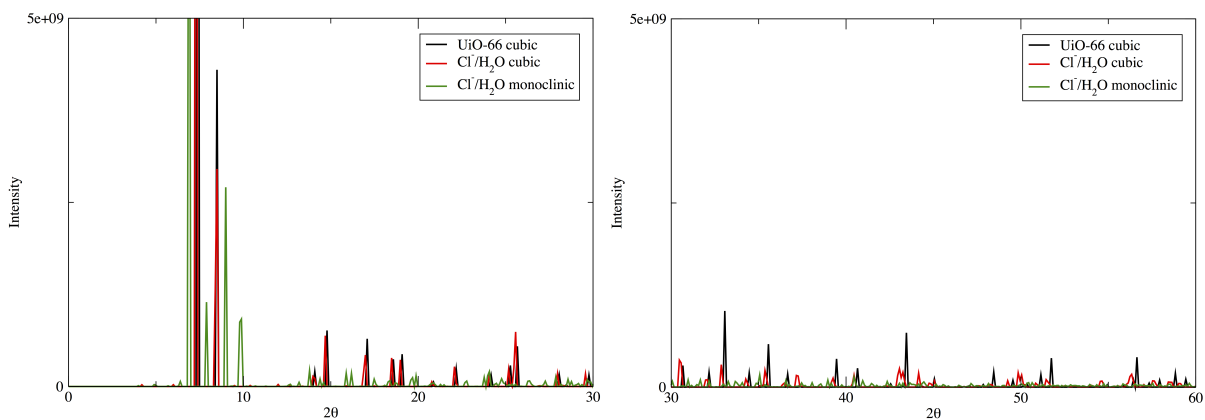

Figure S6: Zoomed in view of the XRD patterns of the cubic phase of UiO-66 with 1 (black) missing linker and monoclinic phase 7 (red) missing linkers with  $\text{Cl}^-/\text{H}_2\text{O}$  as the charge capping mechanism.

## 9. Vibrational and Raman spectra

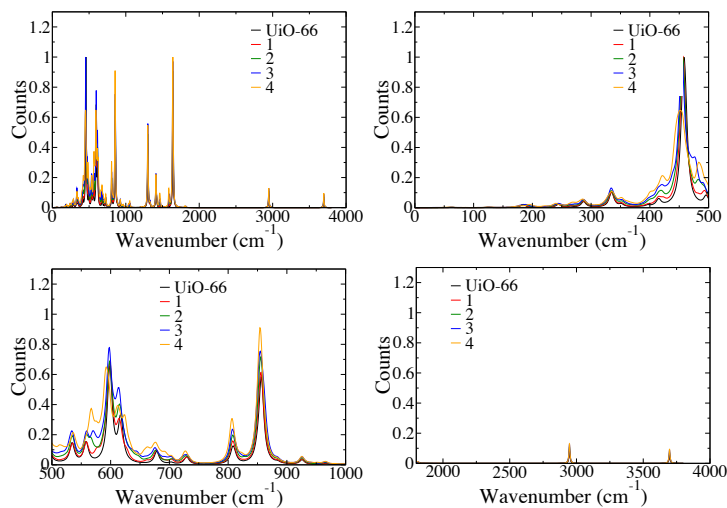

Figure S7: IR spectra of non-defective UiO-66 with 1–4 linkers removed with acetic acid capping.

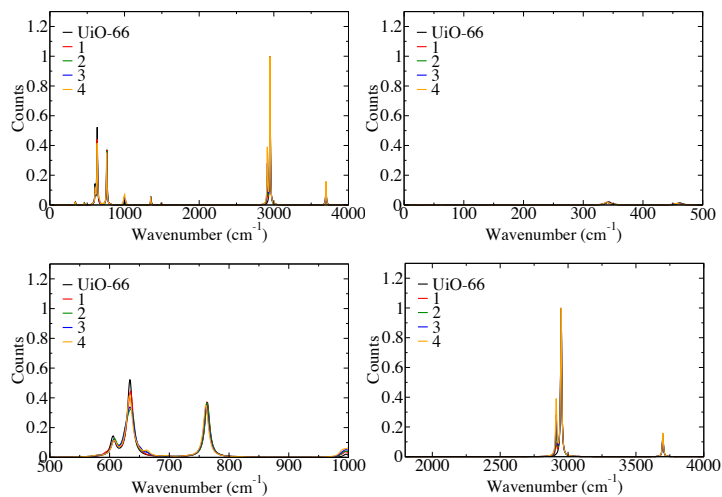

Figure S8: Raman spectra of non-defective UiO-66 with 1–4 linkers removed with acetic acid capping.



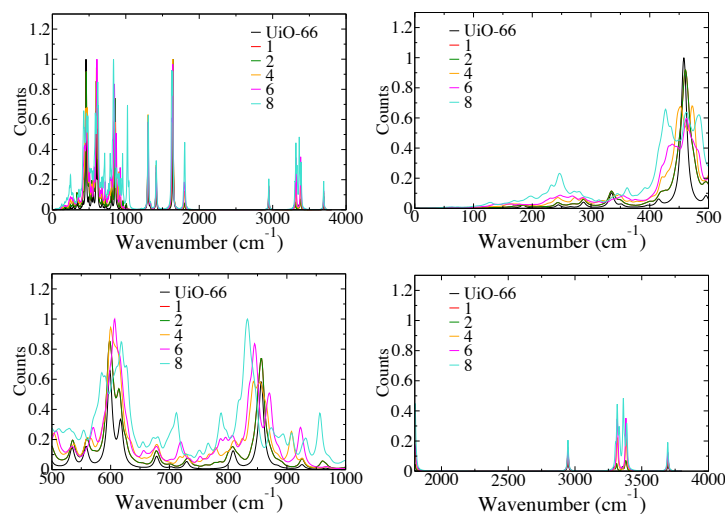

Figure S9: IR spectra of non-defective UiO-66 with 1, 2, 4, 6 and 8 linkers removed with  $\text{Cl}^-/\text{H}_2\text{O}$  capping.

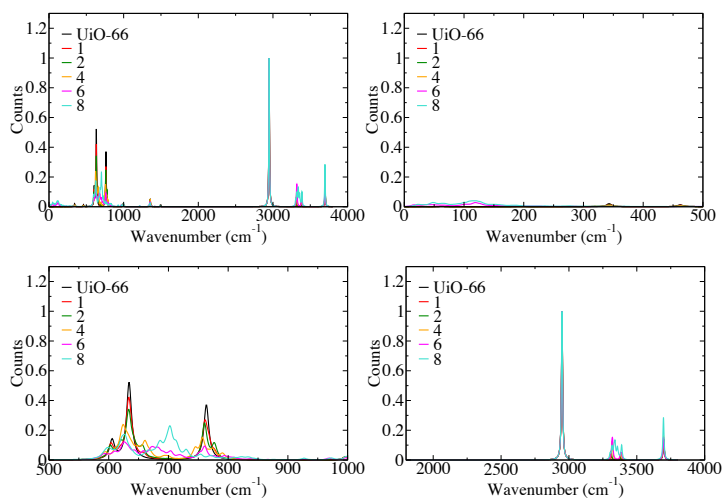

Figure S10: Raman spectra of non-defective UiO-66 with with 1, 2, 4, 6 and 8 linkers removed with  $\text{Cl}^-/\text{H}_2\text{O}$  capping.

## 10. Boltzmann distributions

The equilibrium distributions of defects in the structure can be estimated from

$$C_n = g_n \exp\left(\frac{-\Delta G_n}{k_B T}\right) / Z$$

where  $g_n$  is the degeneracy of each configuration,  $\Delta G_n$  is the defect free energy (Tables S12, S13, and S14), and  $Z$  is the vibration partition function

$$Z = \sum_n g_n \exp\left(\frac{-\Delta G_n}{k_B T}\right)$$

Table S16: Degeneracies of defect configurations and Boltzmann population (in %) of the acetate capping for 2 linker vacancies.

| Configuration | $g_i$ | Temperature (K) |       |      |      |      |      |
|---------------|-------|-----------------|-------|------|------|------|------|
|               |       | 215             | 250   | 300  | 350  | 400  | 410  |
| 1             | 4     | 100.0           | 100.0 | 99.9 | 99.7 | 99.2 | 99.1 |
| 2             | 4     | 0.0             | 0.0   | 0.1  | 0.3  | 0.6  | 0.7  |
| 3             | 1     | 0.0             | 0.0   | 0.0  | 0.0  | 0.1  | 0.1  |
| 4             | 2     | 0.0             | 0.0   | 0.0  | 0.0  | 0.1  | 0.1  |
| 5             | 2     | 0.0             | 0.0   | 0.0  | 0.0  | 0.0  | 0.0  |
| 6             | 1     | 0.0             | 0.0   | 0.0  | 0.0  | 0.0  | 0.0  |
| 7             | 8     | 0.0             | 0.0   | 0.0  | 0.0  | 0.0  | 0.1  |
| 8             | 1     | 0.0             | 0.0   | 0.0  | 0.0  | 0.0  | 0.0  |

Table S17: Degeneracies of defect configurations and Boltzmann population (in %) of the  $\text{Cl}^-/\text{H}_2$  capping for 2 linker vacancies.

| Configuration | $g_i$ | Temperature (K) |      |      |      |      |      |
|---------------|-------|-----------------|------|------|------|------|------|
|               |       | 215             | 250  | 300  | 350  | 400  | 410  |
| 1             | 4     | 100.0           | 99.9 | 99.4 | 98.2 | 96.5 | 96.1 |
| 2             | 4     | 0.0             | 0.1  | 0.3  | 0.7  | 1.3  | 1.5  |
| 3             | 1     | 0.0             | 0.0  | 0.1  | 0.2  | 0.3  | 0.3  |
| 4             | 2     | 0.0             | 0.0  | 0.1  | 0.3  | 0.7  | 0.8  |
| 5             | 2     | 0.0             | 0.0  | 0.0  | 0.1  | 0.2  | 0.2  |
| 6             | 1     | 0.0             | 0.0  | 0.0  | 0.1  | 0.1  | 0.1  |
| 7             | 8     | 0.0             | 0.0  | 0.1  | 0.4  | 0.8  | 0.9  |
| 8             | 1     | 0.0             | 0.0  | 0.0  | 0.0  | 0.1  | 0.1  |

Table S18: Degeneracies of defect configurations and Boltzmann population (in %) of the acetate capping for 3 linker vacancies with temperature.

| Configuration | $g_i$ | Temperature (K) |       |       |      |      |      |
|---------------|-------|-----------------|-------|-------|------|------|------|
|               |       | 215             | 250   | 300   | 350  | 400  | 410  |
| 1             | 2     | 100.0           | 100.0 | 100.0 | 99.8 | 99.3 | 99.0 |
| 2             | 9     | 0.0             | 0.0   | 0.0   | 0.2  | 0.5  | 0.6  |
| 3             | 2     | 0.0             | 0.0   | 0.0   | 0.0  | 0.1  | 0.1  |
| 4             | 6     | 0.0             | 0.0   | 0.0   | 0.0  | 0.1  | 0.1  |
| 5             | 6     | 0.0             | 0.0   | 0.0   | 0.0  | 0.0  | 0.0  |
| 6             | 12    | 0.0             | 0.0   | 0.0   | 0.0  | 0.0  | 0.1  |
| 7             | 12    | 0.0             | 0.0   | 0.0   | 0.0  | 0.0  | 0.1  |
| 8             | 12    | 0.0             | 0.0   | 0.0   | 0.0  | 0.0  | 0.0  |
| 9             | 12    | 0.0             | 0.0   | 0.0   | 0.0  | 0.0  | 0.0  |
| 10            | 2     | 0.0             | 0.0   | 0.0   | 0.0  | 0.0  | 0.0  |
| 11            | 12    | 0.0             | 0.0   | 0.0   | 0.0  | 0.0  | 0.0  |
| 12            | 4     | 0.0             | 0.0   | 0.0   | 0.0  | 0.0  | 0.0  |
| 13            | 12    | 0.0             | 0.0   | 0.0   | 0.0  | 0.0  | 0.0  |
| 14            | 12    | 0.0             | 0.0   | 0.0   | 0.0  | 0.0  | 0.0  |
| 15            | 6     | 0.0             | 0.0   | 0.0   | 0.0  | 0.0  | 0.0  |
| 16            | 12    | 0.0             | 0.0   | 0.0   | 0.0  | 0.0  | 0.0  |
| 17            | 6     | 0.0             | 0.0   | 0.0   | 0.0  | 0.0  | 0.0  |
| 18            | 12    | 0.0             | 0.0   | 0.0   | 0.0  | 0.0  | 0.0  |
| 19            | 2     | 0.0             | 0.0   | 0.0   | 0.0  | 0.0  | 0.0  |
| 20            | 8     | 0.0             | 0.0   | 0.0   | 0.0  | 0.0  | 0.0  |
| 21            | 12    | 0.0             | 0.0   | 0.0   | 0.0  | 0.0  | 0.0  |
| 22            | 12    | 0.0             | 0.0   | 0.0   | 0.0  | 0.0  | 0.0  |
| 23            | 4     | 0.0             | 0.0   | 0.0   | 0.0  | 0.0  | 0.0  |
| 24            | 6     | 0.0             | 0.0   | 0.0   | 0.0  | 0.0  | 0.0  |
| 25            | 6     | 0.0             | 0.0   | 0.0   | 0.0  | 0.0  | 0.0  |
| 26            | 4     | 0.0             | 0.0   | 0.0   | 0.0  | 0.0  | 0.0  |
| 27            | 6     | 0.0             | 0.0   | 0.0   | 0.0  | 0.0  | 0.0  |
| 28            | 3     | 0.0             | 0.0   | 0.0   | 0.0  | 0.0  | 0.0  |
| 29            | 3     | 0.0             | 0.0   | 0.0   | 0.0  | 0.0  | 0.0  |
| 30            | 12    | 0.0             | 0.0   | 0.0   | 0.0  | 0.0  | 0.0  |
| 31            | 3     | 0.0             | 0.0   | 0.0   | 0.0  | 0.0  | 0.0  |
| 32            | 4     | 0.0             | 0.0   | 0.0   | 0.0  | 0.0  | 0.0  |

Table S19: Degeneracies of defect configurations and Boltzmann population (in %) of the  $\text{Cl}^-/\text{H}_2\text{O}$  capping for 3 linker vacancies with temperature.

| Configuration | $g_i$ | Temperature (K) |       |       |      |      |      |
|---------------|-------|-----------------|-------|-------|------|------|------|
|               |       | 215             | 250   | 300   | 350  | 400  | 410  |
| 1             | 2     | 100.0           | 100.0 | 100.0 | 99.8 | 98.9 | 98.7 |
| 2             | 12    | 0.0             | 0.0   | 0.0   | 0.1  | 0.3  | 0.4  |
| 3             | 2     | 0.0             | 0.0   | 0.0   | 0.1  | 0.2  | 0.3  |
| 4             | 6     | 0.0             | 0.0   | 0.0   | 0.0  | 0.1  | 0.1  |
| 5             | 6     | 0.0             | 0.0   | 0.0   | 0.0  | 0.1  | 0.1  |
| 6             | 12    | 0.0             | 0.0   | 0.0   | 0.0  | 0.0  | 0.0  |
| 7             | 12    | 0.0             | 0.0   | 0.0   | 0.0  | 0.1  | 0.1  |
| 8             | 12    | 0.0             | 0.0   | 0.0   | 0.0  | 0.1  | 0.1  |
| 9             | 12    | 0.0             | 0.0   | 0.0   | 0.0  | 0.1  | 0.1  |
| 10            | 2     | 0.0             | 0.0   | 0.0   | 0.0  | 0.1  | 0.1  |
| 11            | 12    | 0.0             | 0.0   | 0.0   | 0.0  | 0.0  | 0.0  |
| 12            | 2     | 0.0             | 0.0   | 0.0   | 0.0  | 0.0  | 0.0  |
| 13            | 12    | 0.0             | 0.0   | 0.0   | 0.0  | 0.0  | 0.0  |
| 14            | 12    | 0.0             | 0.0   | 0.0   | 0.0  | 0.0  | 0.0  |
| 15            | 12    | 0.0             | 0.0   | 0.0   | 0.0  | 0.0  | 0.0  |
| 16            | 6     | 0.0             | 0.0   | 0.0   | 0.0  | 0.0  | 0.0  |
| 17            | 6     | 0.0             | 0.0   | 0.0   | 0.0  | 0.0  | 0.0  |
| 18            | 12    | 0.0             | 0.0   | 0.0   | 0.0  | 0.0  | 0.0  |
| 19            | 2     | 0.0             | 0.0   | 0.0   | 0.0  | 0.0  | 0.0  |
| 20            | 12    | 0.0             | 0.0   | 0.0   | 0.0  | 0.0  | 0.0  |
| 21            | 12    | 0.0             | 0.0   | 0.0   | 0.0  | 0.0  | 0.0  |
| 22            | 12    | 0.0             | 0.0   | 0.0   | 0.0  | 0.0  | 0.0  |
| 23            | 4     | 0.0             | 0.0   | 0.0   | 0.0  | 0.0  | 0.0  |
| 24            | 6     | 0.0             | 0.0   | 0.0   | 0.0  | 0.0  | 0.0  |
| 25            | 6     | 0.0             | 0.0   | 0.0   | 0.0  | 0.0  | 0.0  |
| 26            | 4     | 0.0             | 0.0   | 0.0   | 0.0  | 0.0  | 0.0  |
| 27            | 6     | 0.0             | 0.0   | 0.0   | 0.0  | 0.0  | 0.0  |
| 28            | 3     | 0.0             | 0.0   | 0.0   | 0.0  | 0.0  | 0.0  |
| 29            | 3     | 0.0             | 0.0   | 0.0   | 0.0  | 0.0  | 0.0  |
| 30            | 12    | 0.0             | 0.0   | 0.0   | 0.0  | 0.0  | 0.0  |
| 31            | 3     | 0.0             | 0.0   | 0.0   | 0.0  | 0.0  | 0.0  |
| 32            | 4     | 0.0             | 0.0   | 0.0   | 0.0  | 0.0  | 0.0  |

## 11. Multiple vacancies with $\text{OH}^-/\text{H}_2\text{O}$ capping

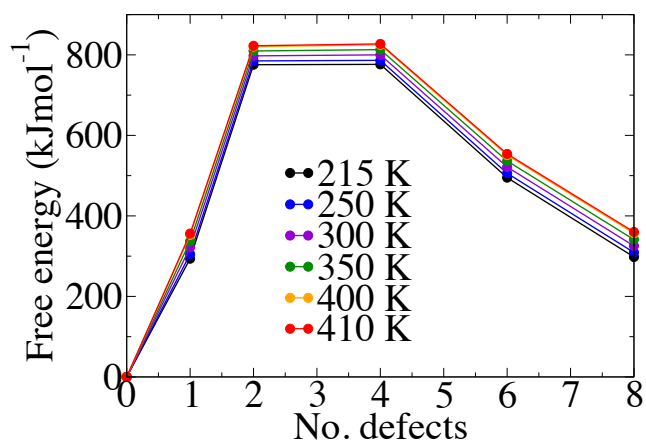

Figure S11: Reaction energy for removing 1–8 linkers from UiO-66 with  $\text{OH}^-/\text{H}_2\text{O}$  capping. NU-1000 is UiO-66 with 8 linkers missing. The path for linker removal was chosen to maintain the highest symmetry to reach NU-1000 topology.

## 12. Forcefield parameters and atom types

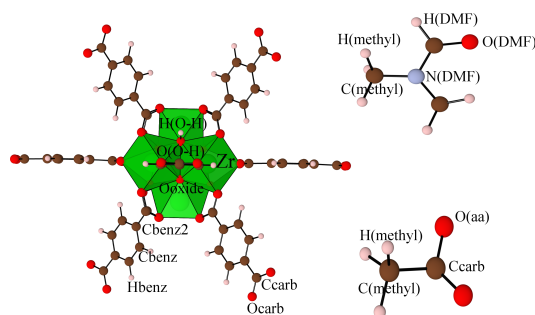

Figure S12: Atom types used for UiO-66 framework and charge compensating molecules.

Table S20: Charges used for the UiO-66 framework. Atom types are given in Figure S9.

| atom type | charge |
|-----------|--------|
| H(O-H)    | 0.15   |
| Hbenz     | 0.11   |
| Cbenz     | -0.07  |
| Cbenz2    | 0.01   |
| Ccarb     | 1.17   |
| Ocarb     | -1.13  |
| Ooxide    | -2.00  |
| O(OH)     | -1.15  |
| Zr        | 4.00   |

Table S21: Non-bonding parameters for the UiO-66 framework. Note the absence of Lennard-Jones parameters for Zr and O(oxide) to avoid double counting of interactions associated with the metal node. Lennard-Jones total energy is calculated using epsilon/sigma rather than A and B typical constants.  $E_{L-J} = \epsilon(\sigma/\mathbf{r})^{12} - 2(\sigma/\mathbf{r})^6$ . Cut-off was set to 12.5Å and 12.0Å for Lennard-Jones and Buckingham parameters, respectively.

| <b>Lennard-Jones</b> |              |            |                       |
|----------------------|--------------|------------|-----------------------|
| atom type            | epsilon (eV) | sigma (AA) |                       |
| H(O-H)               | 0.130E-02    | 1.358      |                       |
| Hbenz                | 0.130E-02    | 1.358      |                       |
| Cbenz                | 0.304E-02    | 1.992      |                       |
| Cbenz2               | 0.304E-02    | 1.992      |                       |
| Ccarb                | 0.304E-02    | 2.000      |                       |
| Ocarb                | 0.520E-02    | 1.700      |                       |
| Ooxide               | -            | -          |                       |
| O(OH)                | 0.833E-02    | 1.765      |                       |
| Zr                   | -            | -          |                       |
| <b>Buckingham</b>    |              |            |                       |
| atom types           | A (eV)       | $\rho$ (Å) | C (eVÅ <sup>6</sup> ) |
| Ooxide-Zr            | 7290.347     | 0.261      | 0.000                 |
| Ocarb-Zr             | 2622.296     | 0.297      | 0.000                 |
| O(O-H)-Zr            | 2577.933     | 0.297      | 0.000                 |

Table S22: Bonding parameters for the UiO-66 framework.

| <b>Bond stretch</b>       |                          |            |                    |
|---------------------------|--------------------------|------------|--------------------|
| Atom types                | k (eVÅ <sup>-2</sup> )   | $r_0$      |                    |
| Cbenz2-Ccarb              | 17.346                   | 1.500      |                    |
| Cbenz-Cbenz               | 26.452                   | 1.375      |                    |
| Cbenz2-Cbenz              | 26.452                   | 1.375      |                    |
| Hbenz-Cbenz               | 29.488                   | 1.080      |                    |
| Ccarb-Ocarb               | 45.533                   | 1.260      |                    |
| H(O-H)-O(O-H)             | 47.267                   | 0.960      |                    |
| <b>Bond angles</b>        |                          |            |                    |
| Atom types                | k (eVrad <sup>-2</sup> ) | $\theta_0$ |                    |
| Ccarb-Ocarb-Ocarb         | 8.673                    | 133.0      |                    |
| Cbenz-Cbenz2-Cbenz        | 3.469                    | 120.0      |                    |
| Cbenz2-Cbenz-Cbenz        | 3.469                    | 120.0      |                    |
| Cbenz2-Cbenz-Ccarb        | 3.903                    | 119.0      |                    |
| Cbenz-Hbenz-Cbenz2        | 2.602                    | 120.0      |                    |
| Cbenz-Hbenz-Cbenz         | 2.602                    | 120.0      |                    |
| Ccarb-Cbenz2-Ocarb        | 3.469                    | 116.0      |                    |
| <b>Torsions</b>           |                          |            |                    |
| Atom types                | k (eV)                   | nphase     | $\phi_0(^{\circ})$ |
| Cbenz2-Cbenz-Cbenz-Cbenz2 | 0.134                    | 2          | 180.0              |
| Cbenz-Cbenz2-Cbenz-Cbenz  | 0.134                    | 2          | 180.0              |
| Cbenz2-Cbenz-Cbenz-Hbenz  | 0.182                    | 2          | 180.0              |
| Cbenz-Cbenz2-Cbenz-Hbenz  | 0.182                    | 2          | 180.0              |
| Ocarb-Ccarb-Cbenz2-Cbenz  | 0.134                    | 2          | 180.0              |
| Ccarb-Cbenz2-Cbenz-Cbenz  | 0.134                    | 2          | 180.0              |
| Ccarb-Cbenz2-Cbenz-Hbenz  | 0.104                    | 2          | 180.0              |
| Hbenz-Cbenz-Cbenz-Hbenz   | 0.104                    | 2          | 180.0              |

Table S23: Charges used for DMF. Atom types are given in Figure S9.

| Atom type | charge |
|-----------|--------|
| H(methyl) | 0.01   |
| C(methyl) | 0.06   |
| H(DMF)    | 0.10   |
| C(DMF)    | 0.97   |
| N(DMF)    | -0.42  |
| O(DMF)    | -0.83  |

Table S24: Non-bonding parameters for DMF. Lennard-Jones total energy is calculated using epsilon/sigma rather than A and B typical constants.  $E_{L-J} = \epsilon(\sigma/\mathbf{r})^{12} - 2(\sigma/\mathbf{r})^6$ . Cut-off was set to 12.5Å and 12.0Å for Lennard-Jones and Buckingham parameters, respectively.

| <b>Lennard-Jones</b> |              |            |                       |
|----------------------|--------------|------------|-----------------------|
| atom type            | epsilon (eV) | sigma (AA) |                       |
| H(methyl)            | 0.195E-02    | 1.340      |                       |
| C(methyl)            | 0.139E-02    | 2.000      |                       |
| H(DMF)               | 0.199E-02    | 0.900      |                       |
| C(DMF)               | 0.477E-02    | 2.000      |                       |
| N(DMF)               | 0.867E-02    | 1.850      |                       |
| O(DMF)               | 0.520E-02    | 1.700      |                       |
| <b>Buckingham</b>    |              |            |                       |
| atom types           | A (eV)       | $\rho$ (Å) | C (eVÅ <sup>6</sup> ) |
| O(DMF)-Zr            | 1392.296     | 0.297      | 0.000                 |
| H(methyl)-H(methyl)  | 22.000       | 0.425      | 0.000                 |
| H(methyl)-O(DMF)     | 100.000      | 0.425      | 0.000                 |
| H(DMF)-O(O-H)        | 100.000      | 0.425      | 0.000                 |
| H(methyl)-O(O-H)     | 100.000      | 0.425      | 0.000                 |
| O(O-H)-O(DMF)        | 100.000      | 0.425      | 0.000                 |



Table S25: Bonding parameters for DMF.

| <b>Bond stretch</b>                     |                          |                      |                         |
|-----------------------------------------|--------------------------|----------------------|-------------------------|
| Atom types                              | k (eVÅ <sup>-2</sup> )   | <b>r<sub>0</sub></b> |                         |
| C(methyl)-N(methyl)                     | 27.320                   | 1.434                |                         |
| H(DMF)-C(DMF)                           | 31.266                   | 1.100                |                         |
| C(DMF)-N(methyl)                        | 37.293                   | 1.350                |                         |
| C(DMF)-O(DMF)                           | 45.533                   | 1.260                |                         |
| H(methyl)-C(methyl)                     | 26.799                   | 1.111                |                         |
| C(methyl)-Ccarb                         | 37.346                   | 1.500                |                         |
| <b>Bond angles</b>                      |                          |                      |                         |
| Atom types                              | k (eVrad <sup>-2</sup> ) | <b>θ<sub>0</sub></b> |                         |
| N(methyl)-C(methyl)-C(DMF)              | 3.643                    | 119.5                |                         |
| C(DMF)-N(methyl)-O(DMF)                 | 6.938                    | 124.0                |                         |
| C(DMF)-H(DMF)-N(methyl)                 | 3.729                    | 115.0                |                         |
| C(methyl)-H(methyl)-N(methyl)           | 1.710                    | 105.0                |                         |
| C(DMF)-H(DMF)-O(DMF)                    | 1.710                    | 113.0                |                         |
| N(methyl)-C(methyl)-C(methyl)           | 3.903                    | 121.0                |                         |
| C(methyl)-H(methyl)-H(methyl)           | 3.296                    | 110.0                |                         |
| C(methyl)-H(methyl)-Ccarb               | 60.710                   | 109.5                |                         |
| C(methyl)-H(methyl)-H(methyl)           | 3.296                    | 110.0                |                         |
| Ccarb-C(methyl)-Ocarb                   | 3.469                    | 116.0                |                         |
| <b>Torsions</b>                         |                          |                      |                         |
| Atom types                              | k (eV)                   | nphase               | <b>φ<sub>0</sub>(°)</b> |
| O(DMF)-C(DMF)-N(methyl)-C(methyl)       | 0.113                    | 2                    | 180.0                   |
| H(DMF)-C(DMF)-N(methyl)-C(methyl)       | 0.113                    | 2                    | 180.0                   |
| H(methyl)-C(methyl)-N(methyl)-C(DMF)    | 0.018                    | 3                    | 0.0                     |
| H(methyl)-C(methyl)-N(methyl)-C(methyl) | 0.018                    | 3                    | 0.0                     |
| Ocarb-Ccarb-C(methyl)-H(methyl)         | 0.108                    | 3                    | 0.0                     |

Table S26: Charges used for Cl<sup>-</sup>.

| Atom type | charge |
|-----------|--------|
| Cl        | -1.00  |

Table S27: Non-bonding parameters for  $\text{Cl}^-$ . Lennard-Jones total energy is calculated using epsilon/sigma rather than A and B typical constants.  $E_{L-J} = \epsilon(\sigma/\mathbf{r})^{12} - 2(\sigma/\mathbf{r})^6$ . Cut-off was set to  $12.5\text{\AA}$  and  $12.0\text{\AA}$  for Lennard-Jones and Buckingham parameters, respectively.

| <b>Lennard-Jones</b> |              |                         |                               |
|----------------------|--------------|-------------------------|-------------------------------|
| atom type            | epsilon (eV) | sigma (AA)              |                               |
| Cl                   | 0.833E-02    | 1.765                   |                               |
| O(O-H)-Cl            | 0.226E-01    | 3.510                   |                               |
| Ocarb-Cl             | 0.474E-02    | 3.310                   |                               |
| O(DMF)-Cl            | 0.274E-02    | 3.310                   |                               |
| N(DMF)-Cl            | 0.974E-02    | 3.310                   |                               |
| <b>Buckingham</b>    |              |                         |                               |
| atom types           | A (eV)       | $\rho$ ( $\text{\AA}$ ) | C ( $\text{eV}\text{\AA}^6$ ) |
| Cl-Zr                | 2322.933     | 0.321                   | 0.000                         |
| H(methyl)-Cl         | 22.000       | 0.425                   | 0.000                         |
| H(DMF)-Cl            | 50.000       | 0.425                   | 0.000                         |
| Hbenz-Cl             | 22.000       | 0.425                   | 0.000                         |

Table S28: Charges used for acetic acid. Atom types are given in Figure S9. Note that C(methyl) and H(methyl) are the same atom types as were used for DMF.

| Atom type | charge |
|-----------|--------|
| O(aa)     | -1.13  |
| H(methyl) | 0.01   |
| C(methyl) | 0.06   |
| Ccarb     | 1.17   |

Table S29: Non-bonding parameters for acetic acid. Lennard-Jones total energy is calculated using epsilon/sigma rather than A and B typical constants.  $E_{L-J} = \epsilon(\sigma/\mathbf{r})^{12} - 2(\sigma/\mathbf{r})^6$ . Cut-off was set to  $12.5\text{\AA}$  and  $12.0\text{\AA}$  for Lennard-Jones and Buckingham parameters, respectively.

| <b>Lennard-Jones</b> |              |                         |                               |
|----------------------|--------------|-------------------------|-------------------------------|
| atom type            | epsilon (eV) | sigma (AA)              |                               |
| O(aa)-O(DMF)         | 0.416E-01    | 3.122                   |                               |
| O(O-H)-O(aa)         | 0.216E-01    | 3.122                   |                               |
| O(aa)-Cl             | 0.474E-02    | 3.310                   |                               |
| <b>Buckingham</b>    |              |                         |                               |
| atom types           | A (eV)       | $\rho$ ( $\text{\AA}$ ) | C ( $\text{eV}\text{\AA}^6$ ) |
| O(aa)-Zr             | 2322.296     | 0.297                   | 0.000                         |
| Ocarb-O(aa)          | 100.000      | 0.425                   | 0.000                         |
| H(DMF)-O(aa)         | 100.000      | 0.425                   | 0.000                         |

Table S30: Bonding parameters for acetic acid.

| <b>Bond stretch</b>             |                          |                |                    |
|---------------------------------|--------------------------|----------------|--------------------|
| Atom types                      | k (eVÅ <sup>-2</sup> )   | $\mathbf{r}_0$ |                    |
| Ccarb-O(aa)                     | 45.533                   | 1.260          |                    |
| <b>Bond angles</b>              |                          |                |                    |
| Atom types                      | k (eVrad <sup>-2</sup> ) | $\theta_0$     |                    |
| Ccarb-O(aa)-O(aa)               | 8.673                    | 133.0          |                    |
| Ccarb-Cbenz2-O(aa)              | 3.469                    | 116.0          |                    |
| Ccarb-C(methyl)-O(aa)           | 3.469                    | 116.0          |                    |
| Ccarb-C(methyl)-H(methyl)       | 2.633                    | 109.5          |                    |
| <b>Torsions</b>                 |                          |                |                    |
| Atom types                      | k (eV)                   | nphase         | $\phi_0(^{\circ})$ |
| O(aa)-Ccarb-C(methyl)-H(methyl) | 0.108                    | 3              | 0.0000             |

Table S31: Charges used for water.

| Atom type | charge |
|-----------|--------|
| H(water)  | 0.417  |
| O(water)  | -0.834 |

Table S32: Non-bonding TIP3P and new parameters for water. Lennard-Jones total energy is calculated using epsilon/sigma rather than A and B typical constants.  $E_{L-J} = \epsilon(\sigma/\mathbf{r})^{12} - 2(\sigma/\mathbf{r})^6$ . Cut-off was set to 12.5Å and 12.0Å for Lennard-Jones and Buckingham parameters, respectively.

| <b>Lennard-Jones</b> |              |            |                       |
|----------------------|--------------|------------|-----------------------|
| atom type            | epsilon (eV) | sigma (AA) |                       |
| O(water)             | 0.660E-02    | 1.768      |                       |
| H(water)             | 0.199E-02    | 0.225      |                       |
| O(O-H)-O(water)      | 0.216E-01    | 3.122      |                       |
| O(aa)-O(water)       | 0.216E-01    | 3.122      |                       |
| Ocarb-O(water)       | 0.216E-01    | 3.122      |                       |
| O(DMF)-O(water)      | 0.216E-01    | 3.122      |                       |
| O(water)-O(water)    | 0.216E-01    | 3.122      |                       |
| <b>Buckingham</b>    |              |            |                       |
| atom types           | A (eV)       | $\rho$ (Å) | C (eVÅ <sup>6</sup> ) |
| O(aa)-Zr             | 2322.296     | 0.297      | 0.000                 |
| Ocarb-O(aa)          | 100.000      | 0.425      | 0.000                 |
| H(DMF)-O(aa)         | 100.000      | 0.425      | 0.000                 |

Table S33: Bonding parameters for water from the TIP3P model.

---

| <b>Bond stretch</b>        |                          |            |
|----------------------------|--------------------------|------------|
| Atom types                 | k (eVÅ <sup>-2</sup> )   | $r_0$      |
| H(water)-O(water)          | 39.028                   | 0.957      |
| H(water)-H(water)          | 0.000                    | 1.514      |
| <b>Bond angles</b>         |                          |            |
| Atom types                 | k (eVrad <sup>-2</sup> ) | $\theta_0$ |
| O(water)-H(water)-H(water) | 4.770                    | 104.5      |

---

## 13. Cluster geometries

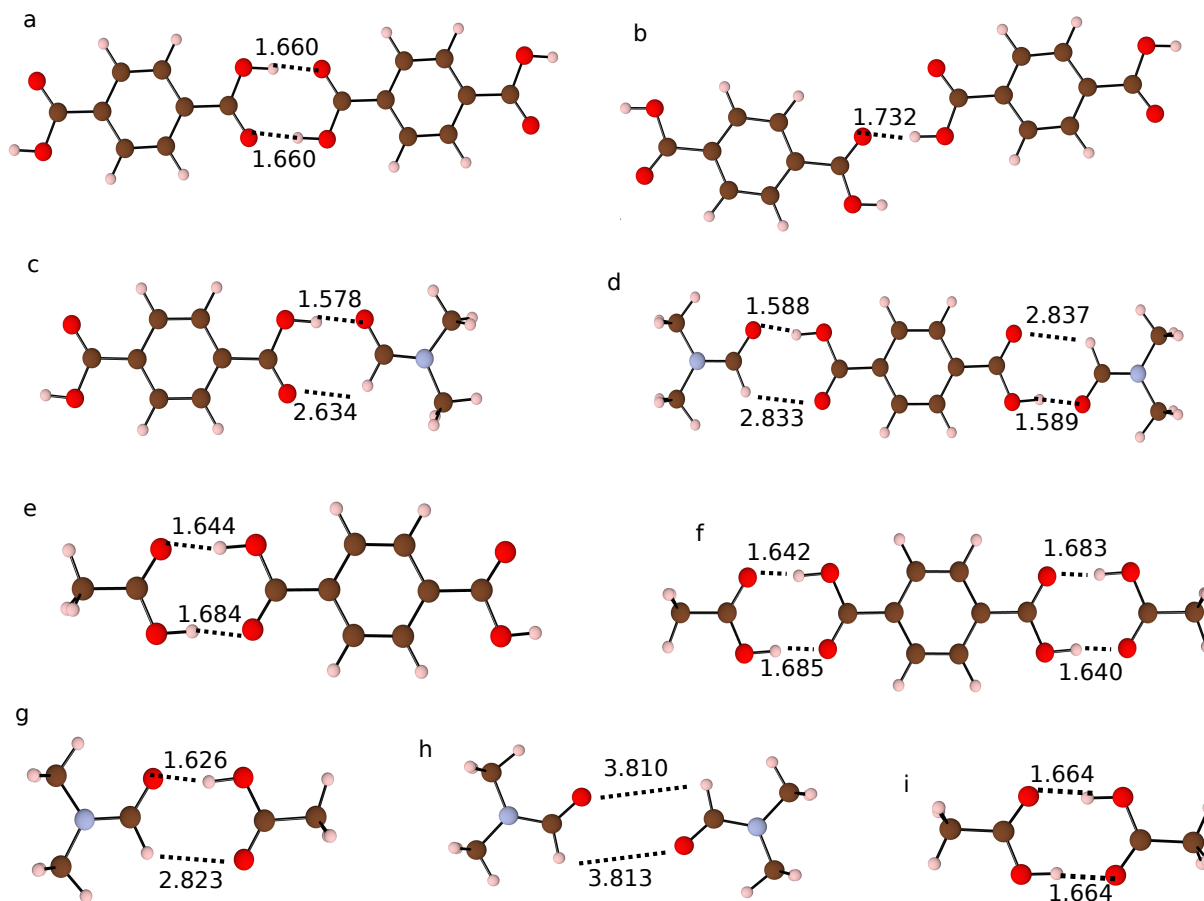

Figure S13: Measured intermolecular distances between components of clusters between molecular precursors.

## References

- (S1) Bass, S.; Nathan, W.; Meighan, R.; Cole, R. *J. Phys. Chem.* **1964**, *68*, 509–515.
- (S2) Bristow, J. K.; Tiana, D.; Walsh, A. *J. Chem. Theory Comput.* **2014**, *10*, 4644–4652.
- (S3) Addicoat, M. A.; Vankova, N.; Akter, F. I.; Heine, T. *J. Chem. Theory Comput.* **2014**, *10*, 880–891.

- 
- (S4) Bureekaew, S.; Amirjalayer, S.; Tafipolsky, M.; Spickermann, C.; Roy, T. K.; Schmid, R. *Phys. Status Solidi B* **2013**, *250*, 1128–1141.
- (S5) Brooks, B. R.; Bruccoleri, R. E.; Olafson, B. D.; States, D. J.; Swaminathan, S.; Karplus, M. *J. Comput. Chem.* **1983**, *4*, 187–217.
- (S6) Brooks, B. R.; Brooks, C. L.; MacKerell, A. D.; Nilsson, L.; Petrella, R. J.; Roux, B.; Won, Y.; Archontis, G.; Bartels, C.; Boresch, S. *J. Comput. Chem.* **2009**, *30*, 1545–1614.
- (S7) Jorgensen, W. L.; Chandrasekhar, J.; Madura, J. D.; Impey, R. W.; Klein, M. L. *J. Chem. Phys.* **1983**, *79*, 926–935.
- (S8) Neria, E.; Fischer, S.; Karplus, M. *J. Chem. Phys.* **1996**, *105*, 1902–1921.
- (S9) Raiteri, P.; Demichelis, R.; Gale, J. D.; Kellermeier, M.; Gebauer, D.; Quigley, D.; Wright, L. B.; Walsh, T. R. *Farad. Discuss.* **2012**, *159*, 61–85.
- (S10) Gale, J. D. *J. Chem. Soc. Faraday Trans.* **1997**, *93*, 629–637.
- (S11) Gasteiger, J.; Marsili, M. *Tetrahedron* **1980**, *36*, 3219–3228.
- (S12) Yang, Q.; Guillerm, V.; Ragon, F.; Wiersum, A. D.; Llewellyn, P. L.; Zhong, C.; Devic, T.; Serre, C.; Maurin, G. *Chem. Commun.* **2012**, *48*, 9831–9833.
